# Supplementary material for: Photoluminescence and energy transfer rates and efficiencies in Eu3+activated Tb2Mo3O12
Source: Royal Society of Chemistry journal article supplement (doi:10.1039/c4tc02588a), 2014-12-30
Supplement: c4tc02588a1.pdf [file c4tc02588a1.pdf]

Supporting information

CIE1931 colour points of TM:Eu<sup>3+</sup> with various Eu<sup>3+</sup> concentrations upon 487 nm excitation.
